# Supplementary material for: Measuring FeO variation using astronomical spectroscopic observations
Source: Copernicus journal article supplement (doi:10.5194/acp-17-4177-2017), 2017-03-28
Supplement: Supplementary file 1 [file acp-17-4177-2017-supplement.zip]

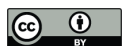

*Supplement of*

## **Measuring FeO variation using astronomical spectroscopic observations**

**Stefanie Unterguggenberger et al.**

*Correspondence to:* Stefanie Unterguggenberger ([stefanie.unterguggenberger@uibk.ac.at](mailto:stefanie.unterguggenberger@uibk.ac.at))

- [acp-17-4177-2017-supplement-title-page.pdf](#)
- [plot\\_data](#)
  - [fig1+fig5.dat](#)
  - [fig2.dat](#)
  - [fig3.dat](#)
  - [fig4.dat](#)
  - [fig6\\_7\\_waccm\\_era\\_fena\\_airglow\\_Chilean\\_Atacama\\_desert\\_2009\\_2015\\_daily.txt](#)
  - [fig8\\_o3\\_fe\\_na\\_temp\\_waccm\\_era\\_2009\\_2015.txt](#)
  - [readme\\_Unterguggenberger\\_et\\_al\\_ACP\\_2017.txt](#)

The copyright of individual parts of the supplement might differ from the CC-BY 3.0 licence.
